# Supplementary material for: A novel antisense RNA regulates at transcriptional level the virulence gene icsA of Shigella flexneri
Source: PubMed Central journal article supplement — Nucleic Acids Res. 2010 Feb 3;38(10):3362–75. doi: 10.1093/nar/gkq025 (PMC2879508; doi:10.1093/nar/gkq025), 2010-02-03

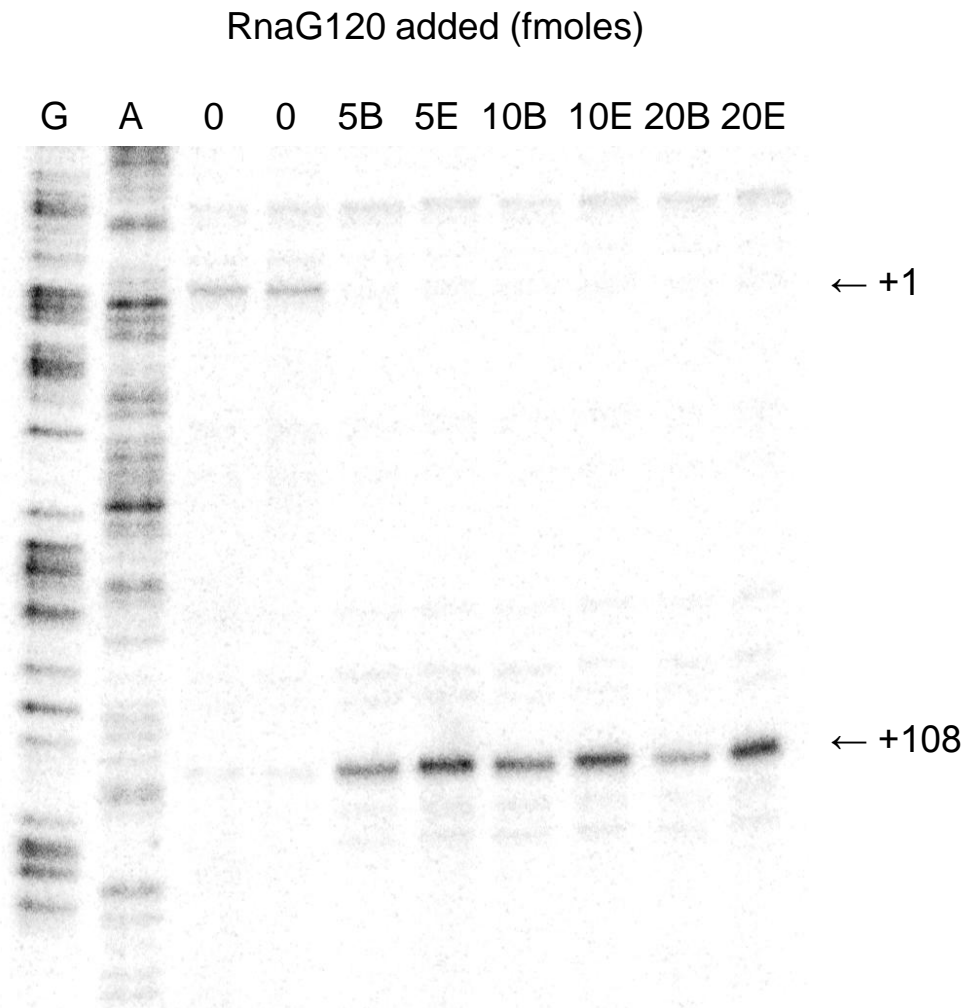

**Figure 2S. The RnaG120 downregulates *icsA* transcription.**

*In vitro* transcription was carried out on supercoiled pGT1129 as described in the text and in the legend of Figure 7 as function of the indicated amounts of RnaG120 corresponding to the antisense region (from pos. +1 to pos. +120). RnaG120 was added either at the beginning (samples B) or at the end (samples E) of the transcription reaction. The *icsA* mRNA was detected by primer extension using the oligo ACC9 (from pos. +197 to pos. +219) which pairs downstream the complementary region between *icsA* transcript and RnaG. Lanes G and A represent the sequencing reactions using the same primer.

**Figure S3. RNA probing of the *icsA* mRNA leader region either alone or in combination with RnaG** The *icsA* mRNA (2 pmoles) was treated with DMS (0.6%) either in the absence (lanes 1 and 2) or in the presence of different amounts of RnaG: 1 pmole (lanes 3 and 4), 2 pmoles (lanes 5 and 6) and 4 pmoles (lanes 7 and 8). Modified nucleotides were detected by primer extension using the oligo G+187 and accessible sites were evaluated comparing samples incubated in the absence (-) and in the presence of DMS. Lanes C, T, A and G correspond to DNA sequencing ladders made with the same primer.

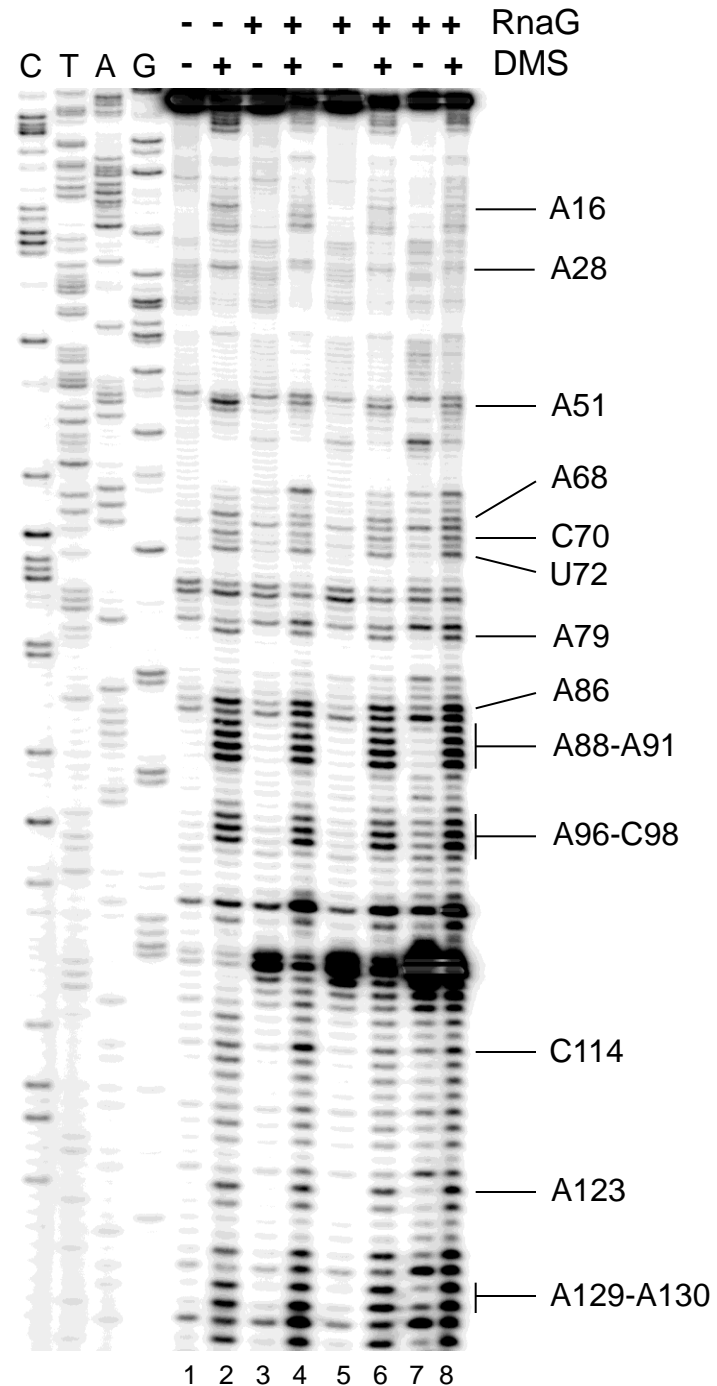

Supplement: gkq025_1.pdf [file gkq025_1.pdf]
